# Supplementary material for: Automated Deep Learning-Based System to Identify Endothelial Cells Derived from Induced Pluripotent Stem Cells
Source: PubMed Central journal article supplement — Stem Cell Reports. 2018 May 10;10(6):1687–95. doi: 10.1016/j.stemcr.2018.04.007 (PMC5989816; doi:10.1016/j.stemcr.2018.04.007), 2018-05-10
Supplement: mmc1.pdf [file mmc1.pdf]

**Stem Cell Reports, Volume 10**

**Supplemental Information**

**Automated Deep Learning-Based System to Identify Endothelial Cells  
Derived from Induced Pluripotent Stem Cells**

**Dai Kusumoto, Mark Lachmann, Takeshi Kunihiro, Shinsuke Yuasa, Yoshikazu Kishino, Mai Kimura, Toshiomi Katsuki, Shogo Itoh, Tomohisa Seki, and Keiichi Fukuda**

## Supplemental Figure Legends

### Figure S1. Generation of iPSC-derived Endothelial Cells

- (A) Differentiation of endothelial cells. iPSCs were seeded onto Matrigel-coated dishes, cultured in indicated conditions, and examined at day 6.
- (B) Phase-contrast images at day 1 to 6. Scale bars, 500  $\mu\text{m}$ .
- (C) Phase-contrast images (upper panels), immunofluorescent staining for CD31 (middle panels), and FACS analysis (bottom panels) showed variability in differentiation at day 6 in various experiments. Left, middle, and right panels show experiments with high, intermediate, and low differentiation efficiency. Scale bars, 200  $\mu\text{m}$ .

### Figure S2. Network Performance Depending on Input Block Size, Staining Threshold and Target Block Size, Related to Figure 2, Tables S1 and S2.

- (A) Phase-contrast and binarized fluorescent images of  $512 \times 512$  px,  $256 \times 256$  px,  $128 \times 128$  px,  $64 \times 64$  px, and  $32 \times 32$  px blocks. Scale bars, 80  $\mu\text{m}$ , 40  $\mu\text{m}$ , 20  $\mu\text{m}$ , 10  $\mu\text{m}$ , and 5  $\mu\text{m}$ , respectively.
- (B) and (C) Accuracy obtained from networks trained on  $32 \times 32$  px,  $64 \times 64$  px,  $128 \times 128$  px,  $256 \times 256$  px, and  $512 \times 512$  px input blocks, using 0.1, 0.2, 0.3, 0.4, 0.5, 0.6, 0.7, 0.8, and 0.9 as staining threshold, *i.e.*, the ratio of white pixels to black for a binarized image to be classified as stained..
- (D) F1 score and accuracy obtained from networks trained on input and target blocks of various sizes.

### Figure S3. Optimization of Network Performance, Related to Figure 3.

- (A) Learning curve of the small and large network, as assessed by accuracy.
- (B) Representative images of true positives and true negatives (blue) and of false positives and false negatives (red). Yellow areas are CD31-stained. Scale bars, 200  $\mu\text{m}$ .

### Figure S4. Correlation Between Image Complexity and F1 score, Related to Figure 3.

- (A) Representative phase-contrast images with complexity 0.00-0.04 (group 1), 0.04-0.08 (group 2), and over 0.08 (group 3). Scale bars, 80  $\mu\text{m}$ .
- (B) F1 score in each group using the small and large network (left), and relationship between F1 score and image complexity (right).
- (C) and (D) Performance statistics from each group (C) and over increasing complexity (D). True positive: TP, True negative: TN, False positive: FP, and False negative: FN
- (E) Time required to classify each block.

## Supplemental Table Legends

### **Table S1. Number of Blocks Required for Learning, Related to Figure 2.**

Networks were trained on 500, 1,000, 2,000, 4,000, 8,000, 16,000, 32,000, 64,000, and 128,000 blocks. Accuracy, recall, precision, and F1 score were assessed using  $128 \times 128$  px input blocks and  $128 \times 128$  px target blocks (left), or using  $512 \times 512$  px input blocks and  $32 \times 32$  px target blocks (right).

### **Table S2. Network Performance Depending on Input Block Size and Staining Threshold, Related to Figures 2 and S2.**

Networks were trained using  $32 \times 32$  px,  $64 \times 64$  px,  $128 \times 128$  px,  $256 \times 256$  px, and  $512 \times 512$  px input blocks, using 0.1, 0.2, 0.3, 0.4, 0.5, 0.6, 0.7, 0.8, and 0.9 as staining threshold, *i.e.*, the ratio of white pixels to black for a binarized image to be classified as stained. Accuracy, recall, precision, and F1 score were calculated.

### **Table S3. Network Performance Depending on Target Block Size, Related to Figures 2 and S2.**

F1 score, accuracy and other indices obtained from networks trained on input and target blocks of various sizes.

### **Table S4. Network Performance, Related to Figures 3 and 4.**

(A) Network performance was compared following training on automatically binarized or rebinarized fluorescent images.

(B) K-fold cross validation of the small network trained on automatically binarized fluorescent images (left), and of the large network trained on rebinarized fluorescent images (right). Independent training and validation were performed according to Figure 4.

## **Supplemental Experimental Procedures**

### **iPSC Culture**

iPSCs were maintained in mTeSR1 (Stem Cell Technologies, Vancouver, BC, Canada) media with 0.5 % penicillin/streptomycin (Thermo Fisher Scientific, Waltham, MA, USA) on culture dishes coated with growth factor-reduced Matrigel (BD Biosciences, San Jose, CA, USA). iPSCs were routinely passaged every week by washing in PBS, incubating in TrypLE Select (Thermo Fisher Scientific) for 3 min at 37 °C, detaching with a cell scraper, harvesting, and reseeding at a split ratio of 1:5 to 1:8 in mTeSR1 with 0.5 % penicillin/streptomycin and 10  $\mu$ M ROCK inhibitor Y-27632 (Wako, Osaka, Japan). Media were changed every other day.

### **Endothelial Cell Differentiation**

iPSCs cultured on Matrigel-coated 6-well plates were detached using TrypLE Select on day 7, and clumps with diameter 100-200  $\mu$ m were reseeded on Matrigel-coated dishes and incubated for 24 hours in mTeSR1 media with 10  $\mu$ M ROCK inhibitor Y-27632. On day 1, mesoderm was induced in N2B27 media (1:1 mixture of DMEM/F12 and Neurobasal media containing N2 and B27, all reagents from Thermo Fisher Scientific) supplemented with  $\beta$ -mercaptoethanol, 8  $\mu$ M CHIR-99021 (Cayman Chemical, Ann Arbor, MI, USA), and 25 ng/mL BMP4 (R&D Systems, Minneapolis, MN, USA). At day 3 and 4, media were replaced with StemPro-34 SFM (Thermo Fisher Scientific) containing 200 ng/mL VEGF (Wako) and 2  $\mu$ M forskolin (Abcam, Cambridge, UK) to induce endothelial cell specification (Patsch et al., 2015). Endothelial cell clusters were reliably obtained on day 6. After sorting by flow cytometry, cells expressing CD31 were cultured for another four days in StemPro-34 SFM containing 50 ng/mL VEGF.

### **Flow Cytometry**

At day 6 of differentiation, cells were dissociated into single cells using Accutase (Innovative Cell Technologies, San Diego, CA, USA), suspended in PBS with 0.5 % BSA, and stained with a 1:50 dilution of APC-conjugated anti-CD31 (Miltenyi Biotec, Bergisch Gladbach, NRW, Germany, catalog no. 130-092-652) according to the manufacturer's instructions. As a negative control, we used unstained cells. Cells were then sorted on a BD FACS Aria III (Becton Dickinson, Franklin Lakes, NJ, USA), and data were collected from at least 10,000 events.

### **Immunocytochemistry**

Cells were fixed in 4 % paraformaldehyde (MUTO Pure Chemicals, Tokyo, Japan) for 20 min at room temperature, washed with PBS, blocked with ImmunoBlock (DS Pharma Biomedical, Osaka, Japan) for 1 h, and probed at 4 °C overnight with 1:20 primary antibodies to CD31 (R&D Systems, catalog no. AF806). Specimens were then washed thrice in PBS, labeled for 1 h with 1:200 secondary anti-sheep IgG (Thermo Fisher Scientific, catalog no. A-11015), and imaged on an inverted fluorescence phase-contrast microscope.

### **Preparation of Datasets**

Phase-contrast and immunofluorescent images were acquired at day 6 of differentiation. Two hundred images were automatically acquired from each of four independent experiments. Phase contrast and fluorescent images were taken on an SI8000 Research Microscope (SONY, Tokyo, Japan) at 10 $\times$  and 0.454  $\mu$ m/pixel. Each image was saved as a



2752 × 2200 px grayscale image in BMP format at 8 bits per pixel. To generate datasets for training and evaluation, 200 input blocks of 32 × 32 px, 64 × 64 px, 128 × 128 px, 256 × 256 px, and 512 × 512 px were randomly extracted from each phase-contrast image. The 256 × 256 px and 512 × 512 px input blocks were resized to 128 × 128 px as needed. Immunofluorescent images of CD31 were binarized using in-house software to distinguish specific signals from nonspecific signals. In particular, pixels were binarized to white if its value (0-255 in raw immunofluorescent images) is above a threshold value empirically determined based on the complete image. All other pixels were binarized to black. Finally, 32 × 32 px and 128 × 128 px target blocks were extracted, corresponding to the center of input blocks.

Data in Figure 2 and 3 were generated based on 640 training images and 160 validation images. In both experiments in Figure 2A, 500, 1,000, 2,000, 4,000, 8,000, 16,000, 32,000, 64,000, and 128,000 blocks were used for training, and 32,000 blocks were used for validation. In Figure 2B, 32,000 blocks were used for training, and 32,000 blocks were used for validation. In Figure 2C to 3E, all 128,000 blocks were used for training, and 32,000 blocks were used for validation. For K-fold validation in Figure 4, four independent data sets of 200 images each were obtained, of which three were used as training sets and one was used as validation set in all possible combinations, such that the number of folds is 4. To rebinarize target blocks, we compared raw fluorescent images to phase-contrast images in GNU Image Manipulation Program, and rebinarized weakly stained, dense colonies as black pixels. All 800 images were processed in this manner.

### Deep Neural Networks

We used LeNet, a small convolutional neural network with two convolution layers, two max pooling layers, and two fully-connected layers, as well as AlexNet, a large network with five convolution layers, three max pooling layers, and three fully-connected layers (Figure 3A). In both networks, each convolutional layer is connected to Rectified Linear Units for activation (Nair and Hinton, 2010). In the output layer, we used a sigmoid function, consistent with binary classification. We used mini-batch training with stochastic gradient descent, learning rate 0.01, cross-entropy error as loss function. Weights were initialized using the Xavier algorithm (Glorot and Bengio, 2010). To avoid overfitting, dropout techniques were used in the large network. Networks were trained using the TensorFlow/Keras framework (Cholle, 2015) on a computer with a Core i7-6700 CPU (Intel, Santa Clara, CA, USA), 16 GB memory, and GeForce GTX980Ti GPU (NVIDIA, Santa Clara, CA, USA).

### Image Complexity

We calculated image complexity (activity), which we used as an index of cell density, in all 32,000 512 × 512 px validation blocks used in the small and large network. This value was

$$Activity = \frac{\sum_{i=0}^{m-2} \sum_{j=0}^{n-1} |I(i, j) - I(i + 1, j)| + \sum_{i=0}^{m-1} \sum_{j=0}^{n-2} |I(i, j) - I(i, j + 1)|}{\{(m - 1)n + m(n - 1)\} \{\max(I) - \min(I)\}}$$

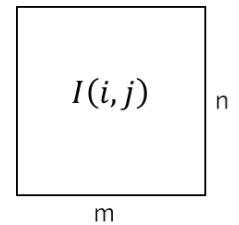

calculated according to

where  $m$  is the image width in pixels,  $n$  is the image height in pixels,  $I$  is the pixel value, and  $(i, j)$  are coordinates ( $x$ -axis,  $y$ -axis). Essentially, image complexity is the average difference between adjacent pixels normalized to the dynamic range (Saha and Vemuri, 2000). Thus, the numerator is the sum of differences in adjacent pixels on both  $x$

and y axes, while the denominator is the product of image size and dynamic range, which is the difference between the maximum and minimum pixel value.

### **Evaluation of Prediction Performance**

Network performance was evaluated based on accuracy and F1 score, which combines recall (sensitivity) and precision (true positive rate). Accordingly, the F1 score is 1 for perfect predictions and 0.5 for random predictions. On the other hand, precision is the fraction of true positives among predicted positives, while recall is the fraction of true positives detected among all positives:

$$F1\ score = \frac{2Recall \times Precision}{Recall + Precision}, Precision = \frac{TP}{TP + FP}, Recall = \frac{TP}{TP + FN}$$

Precision and recall for negative predictions were calculated in a similar manner:

$$Precision\ (negative) = \frac{TN}{TN + FN}, Recall\ (negative) = \frac{TN}{TN + FP}$$

Finally, accuracy is the ratio of correct predictions to all predictions:

$$Accuracy = \frac{TP + TN}{TP + FP + TN + FP}$$

## Supplemental References

Cholle, F. (2015). Keras (<https://github.com/fchollet/keras>: GitHub).

Glorot, X., and Bengio, Y. (2010). Understanding the difficulty of training deep feedforward neural networks. In Proceedings of the Thirteenth International Conference on Artificial Intelligence and Statistics, T. Yee Whye, and T. Mike, eds. (Proceedings of Machine Learning Research: PMLR), pp. 249--256.

Nair, V., and Hinton, G.E. (2010). Rectified linear units improve restricted Boltzmann machines. In Proceedings of the 27th International Conference on International Conference on Machine Learning (Haifa, Israel: Omnipress), pp. 807-814.

Patsch, C., Challet-Meylan, L., Thoma, E.C., Urich, E., Heckel, T., O'Sullivan, J.F., Grainger, S.J., Kapp, F.G., Sun, L., Christensen, K., *et al.* (2015). Generation of vascular endothelial and smooth muscle cells from human pluripotent stem cells. *Nat Cell Biol* 17, 994-1003.

Saha, S., and Vemuri, R. (2000). An analysis on the effect of image activity on lossy coding performance. Paper presented at: 2000 IEEE International Symposium on Circuits and Systems Emerging Technologies for the 21st Century Proceedings (IEEE Cat No00CH36353).

# Supplementary Figure 1

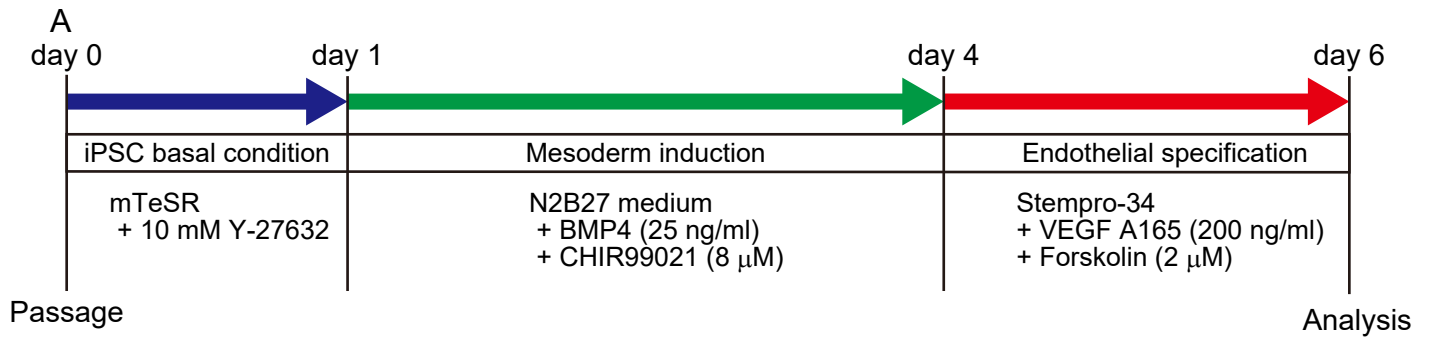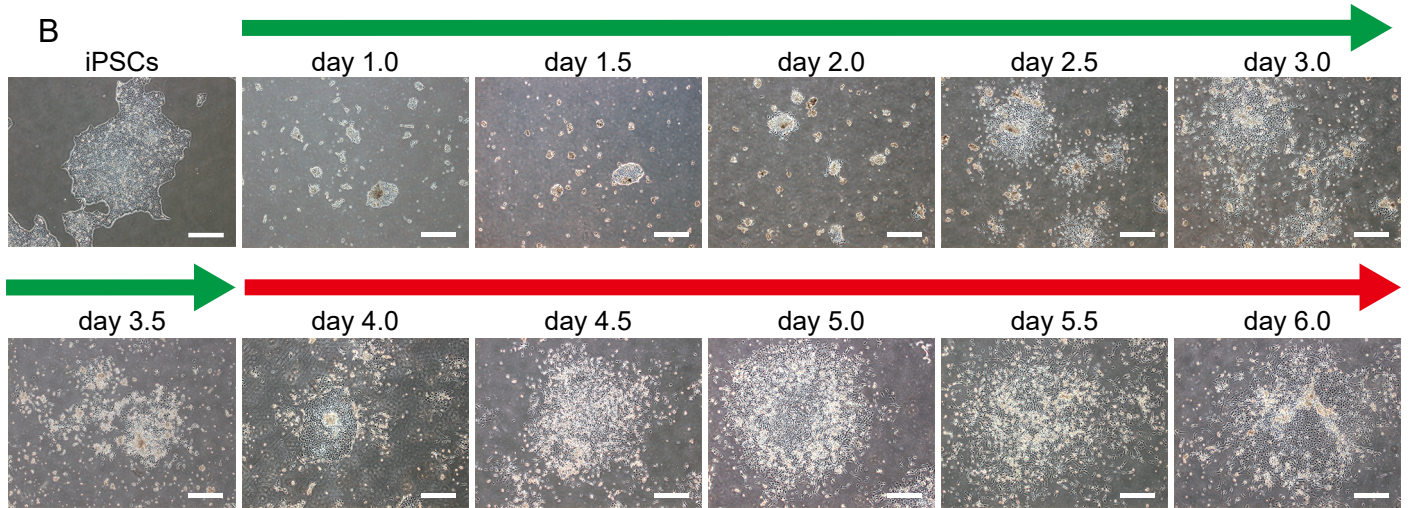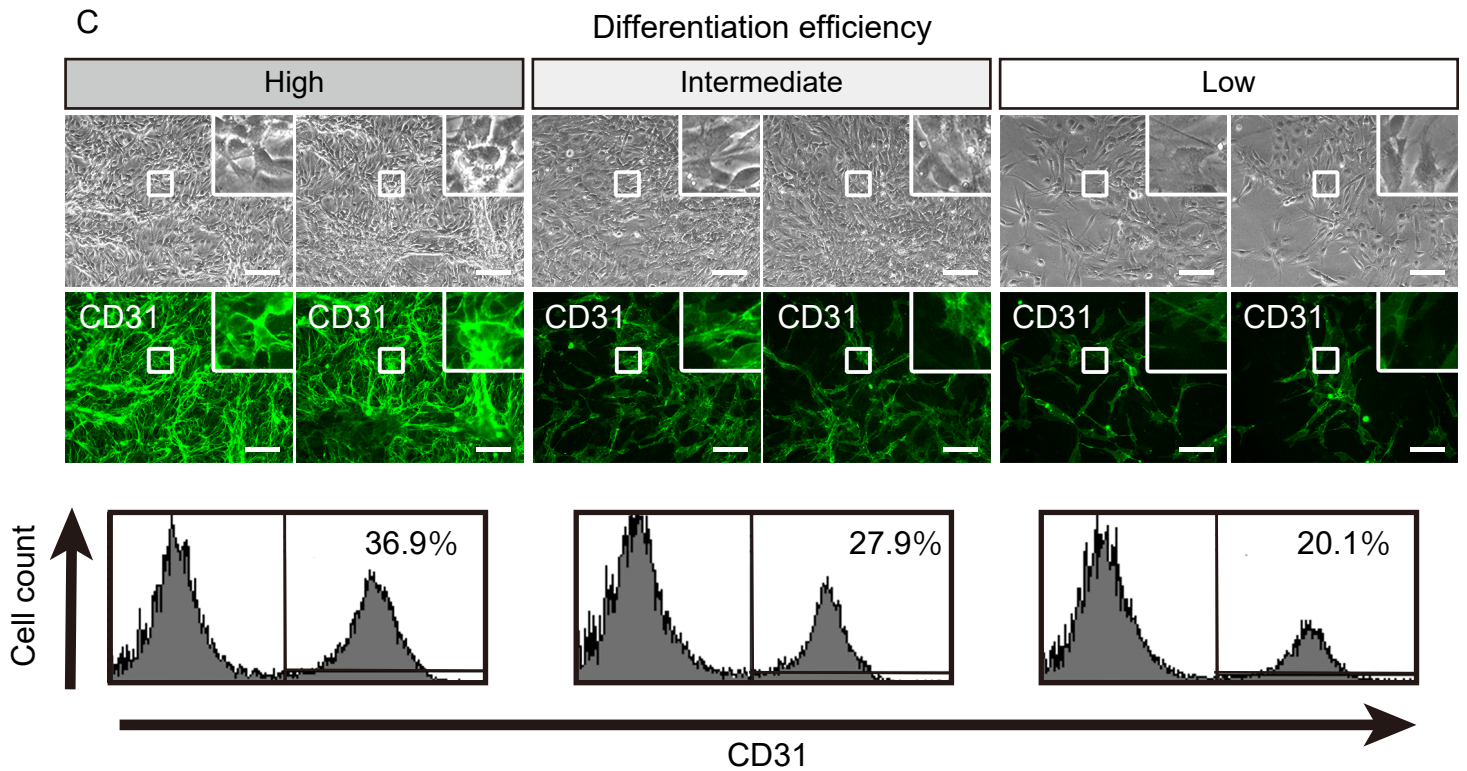

# Supplementary Figure 2

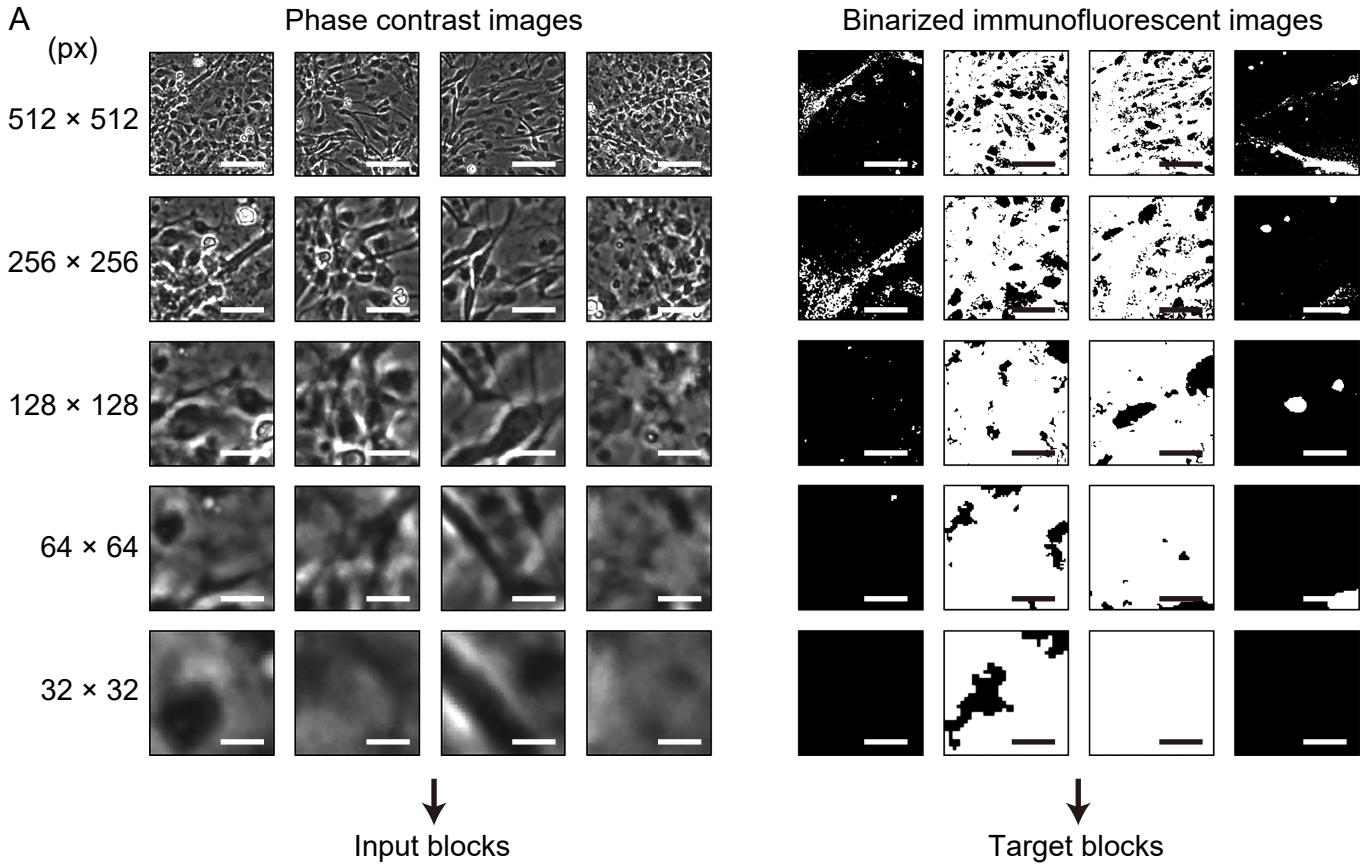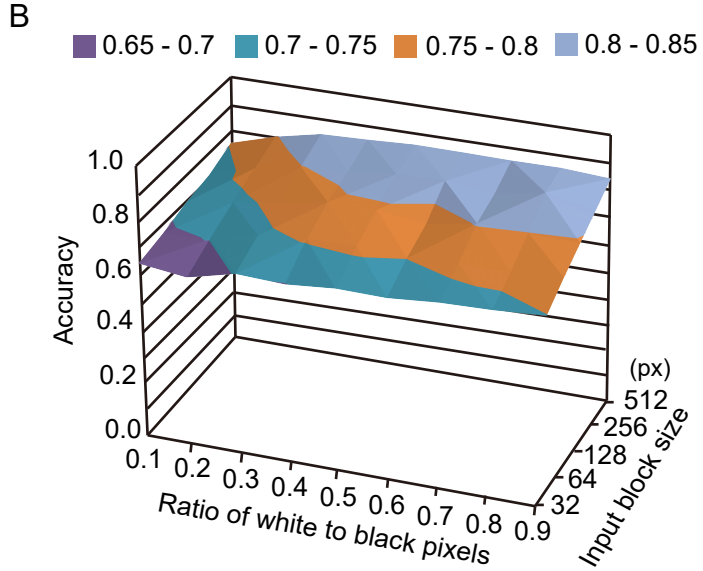

**C**

Accuracy

Input block size (px)

|         | 32     | 64     | 128    | 256    | 512    | Average |
|---------|--------|--------|--------|--------|--------|---------|
| 0.1     | 0.6786 | 0.6919 | 0.7121 | 0.7230 | 0.7529 | 0.7117  |
| 0.2     | 0.6624 | 0.7019 | 0.7364 | 0.7685 | 0.7978 | 0.7334  |
| 0.3     | 0.7028 | 0.7389 | 0.7626 | 0.7988 | 0.8304 | 0.7667  |
| 0.4     | 0.6986 | 0.7546 | 0.7900 | 0.8084 | 0.8366 | 0.7776  |
| 0.5     | 0.7144 | 0.7599 | 0.7925 | 0.8258 | 0.8448 | 0.7875  |
| 0.6     | 0.7143 | 0.7509 | 0.7745 | 0.8304 | 0.8444 | 0.7829  |
| 0.7     | 0.7295 | 0.7635 | 0.8027 | 0.8140 | 0.8431 | 0.7906  |
| 0.8     | 0.7364 | 0.7639 | 0.7994 | 0.8448 | 0.8448 | 0.7979  |
| 0.9     | 0.7491 | 0.7752 | 0.7954 | 0.8147 | 0.8360 | 0.7941  |
| Average | 0.7096 | 0.7445 | 0.7740 | 0.8032 | 0.8256 |         |

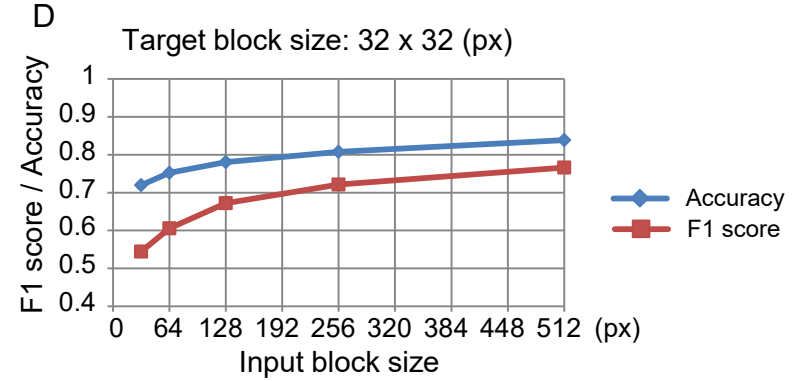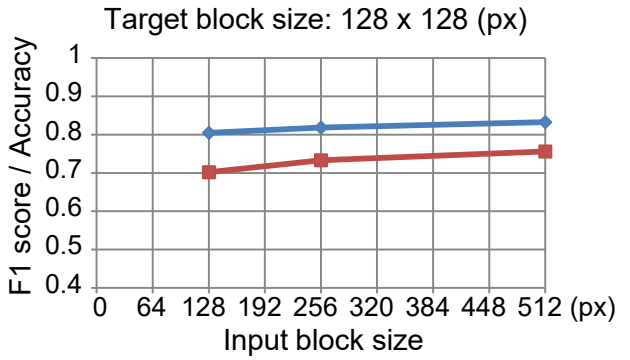



# Supplementary Figure 3

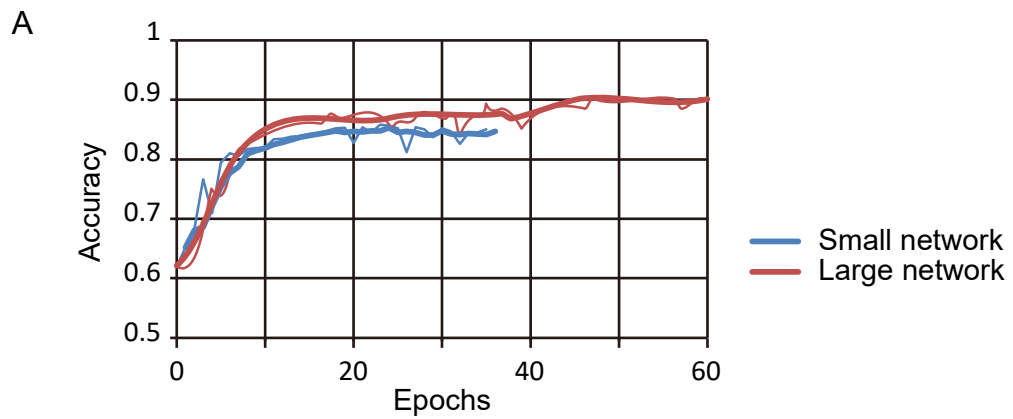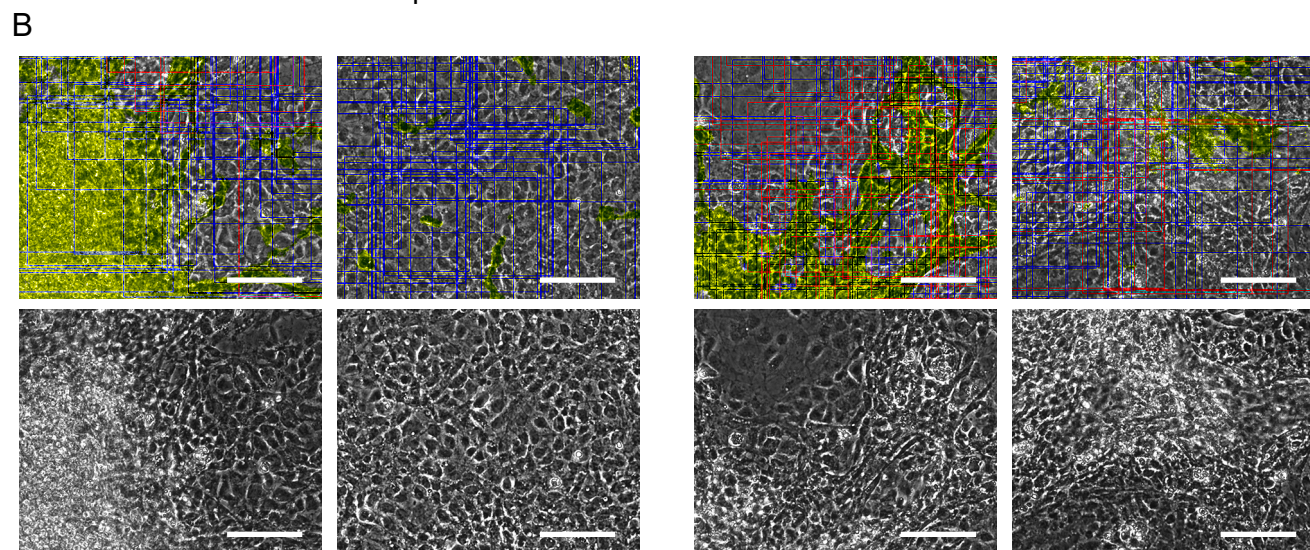

# Supplementary Figure 4

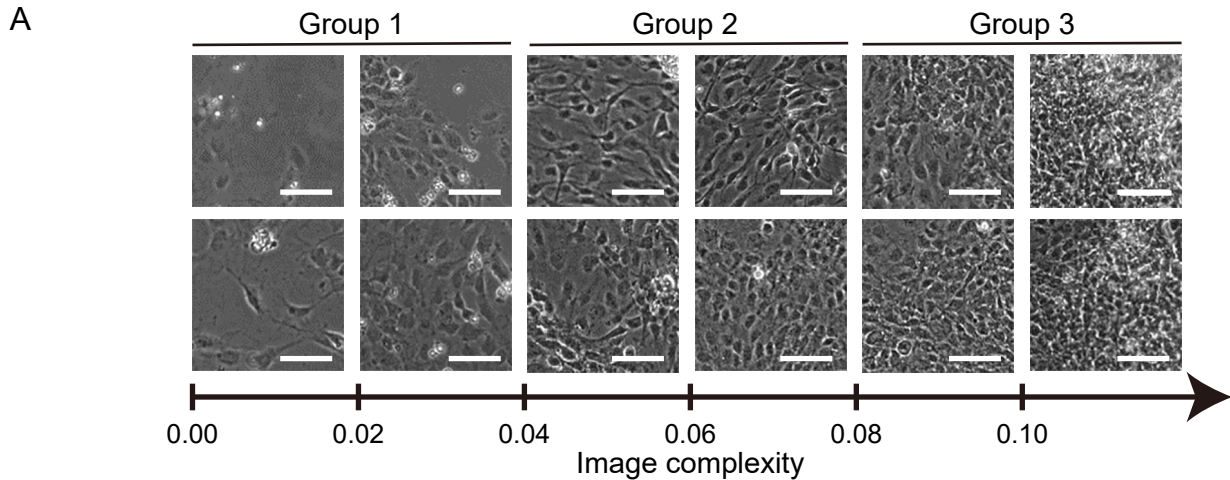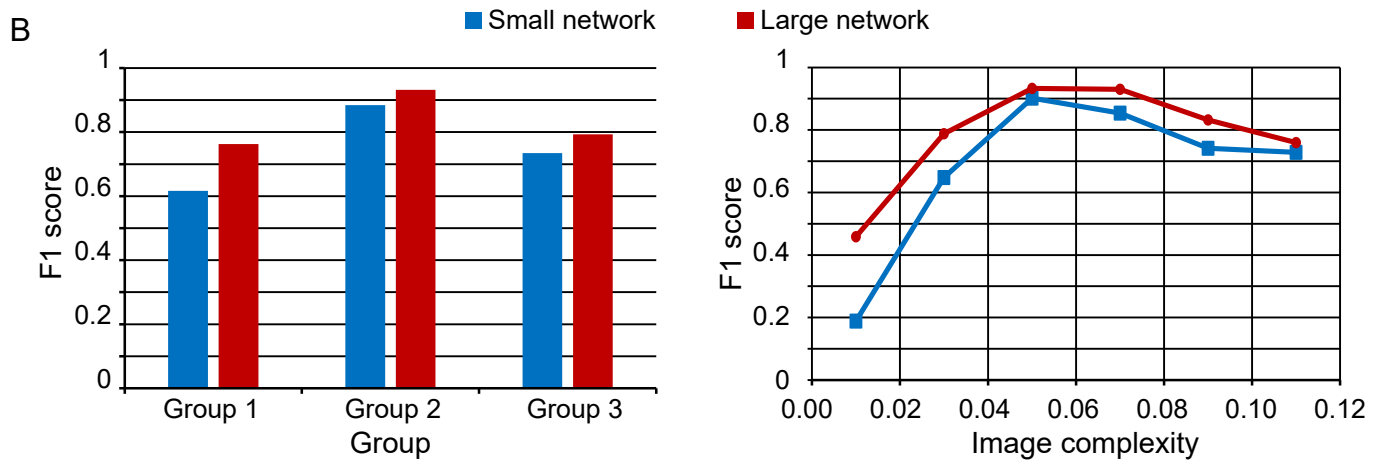

**C**

| Group         | Image complexity | TN        | FN    | FP    | TP  | Precision | Recall   | Accuracy | F1 score |          |
|---------------|------------------|-----------|-------|-------|-----|-----------|----------|----------|----------|----------|
| Small network | 1                | 0.00-0.04 | 8,657 | 707   | 546 | 1,006     | 0.648196 | 0.587274 | 0.885214 | 0.616233 |
|               | 2                | 0.04-0.08 | 2,758 | 992   | 633 | 6,192     | 0.907253 | 0.861915 | 0.846336 | 0.884003 |
|               | 3                | 0.08-     | 6,628 | 1,025 | 604 | 2,252     | 0.788515 | 0.687214 | 0.84499  | 0.734388 |
| Large network | 1                | 0.00-0.04 | 8,870 | 452   | 333 | 1,261     | 0.791092 | 0.736135 | 0.928087 | 0.762625 |
|               | 2                | 0.04-0.08 | 2,818 | 413   | 573 | 6,771     | 0.921977 | 0.942511 | 0.906761 | 0.932131 |
|               | 3                | 0.08-     | 6,603 | 709   | 629 | 2,568     | 0.803253 | 0.783644 | 0.872681 | 0.793327 |

**D**

| Image complexity | TN        | FN    | FP  | TP  | Precision | Recall   | Accuracy | F1 score |          |
|------------------|-----------|-------|-----|-----|-----------|----------|----------|----------|----------|
| Small network    | 0.00-0.02 | 4,595 | 165 | 16  | 21        | 0.567568 | 0.112903 | 0.962268 | 0.188341 |
|                  | 0.02-0.04 | 4,062 | 542 | 530 | 985       | 0.650165 | 0.645056 | 0.824808 | 0.6476   |
|                  | 0.04-0.06 | 1,105 | 475 | 395 | 3,991     | 0.909941 | 0.893641 | 0.854174 | 0.901717 |
|                  | 0.06-0.08 | 1,653 | 517 | 238 | 2,201     | 0.902419 | 0.809787 | 0.83619  | 0.853597 |
|                  | 0.08-0.10 | 3,078 | 487 | 219 | 1,014     | 0.822384 | 0.67555  | 0.852855 | 0.74177  |
|                  | 0.10-     | 3,550 | 538 | 385 | 1,238     | 0.762785 | 0.697072 | 0.838382 | 0.72845  |
| Large network    | 0.00-0.02 | 4,602 | 128 | 9   | 58        | 0.865672 | 0.311828 | 0.97144  | 0.458498 |
|                  | 0.02-0.04 | 4,268 | 324 | 324 | 1,203     | 0.787819 | 0.787819 | 0.8941   | 0.787819 |
|                  | 0.04-0.06 | 1,149 | 251 | 351 | 4,215     | 0.923127 | 0.943798 | 0.899095 | 0.933348 |
|                  | 0.06-0.08 | 1,669 | 162 | 222 | 2,556     | 0.920086 | 0.940397 | 0.916685 | 0.930131 |
|                  | 0.08-0.10 | 3,039 | 247 | 258 | 1,254     | 0.829365 | 0.835443 | 0.894748 | 0.832393 |
|                  | 0.10-     | 3,564 | 462 | 371 | 1,314     | 0.779822 | 0.739865 | 0.854141 | 0.759318 |

**E**      Small network: 100  $\mu$ sec  
           Large network: 275  $\mu$ sec

# Supplementary Table 1

Pred = "Prediction" ; Ans = "Answer" ; 0 = "unstained" ; 1 = "stained"

Input block size: 128 x 128 (px)

Target block size: 128 x 128 (px)

Input block size: 512 x 512 (px)

Target block size: 32 x 32 (px)

| Number of input blocks | Input block size: 128 x 128 (px) |        |        |        |          | Input block size: 512 x 512 (px) |        |        |        |        |
|------------------------|----------------------------------|--------|--------|--------|----------|----------------------------------|--------|--------|--------|--------|
|                        | Pred=0                           | Pred=1 | Total  | Recall |          | Pred=0                           | Pred=1 | Total  | Recall |        |
| 500                    | Ans=0                            | 21,261 | 0      | 21,261 | 1        | Ans=0                            | 21,148 | 0      | 21,148 | 1      |
|                        | Ans=1                            | 10,739 | 0      | 10,739 | 0        | Ans=1                            | 10,852 | 0      | 10,852 | 0      |
|                        | Total                            | 32,000 | 0      | 32,000 |          | Total                            | 32,000 | 0      | 32,000 |        |
|                        | Precision                        | 0.6644 | 0      |        |          | Precision                        | 0.6609 | 0      |        |        |
|                        | F1 score                         | 0.7984 | 0      |        |          | F1 score                         | 0.7958 | 0      |        |        |
|                        | Accuracy                         | 0.6644 |        |        |          | Accuracy                         | 0.6609 |        |        |        |
| 1,000                  | Pred=0                           | Pred=1 | Total  | Recall |          | Pred=0                           | Pred=1 | Total  | Recall |        |
|                        | Ans=0                            | 21,261 | 0      | 21,261 | 1        | Ans=0                            | 21,148 | 0      | 21,148 | 1      |
|                        | Ans=1                            | 10,737 | 2      | 10,739 | 0.0002   | Ans=1                            | 10,852 | 0      | 10,852 | 0      |
|                        | Total                            | 31,998 | 2      | 32,000 |          | Total                            | 32,000 | 0      | 32,000 |        |
|                        | Precision                        | 0.6644 | 1      |        |          | Precision                        | 0.6609 | 0      |        |        |
|                        | F1 score                         | 0.7984 | 0.0004 |        |          | F1 score                         | 0.7958 | 0      |        |        |
| Accuracy               | 0.6645                           |        |        |        | Accuracy | 0.6609                           |        |        |        |        |
| 2,000                  | Pred=0                           | Pred=1 | Total  | Recall |          | Pred=0                           | Pred=1 | Total  | Recall |        |
|                        | Ans=0                            | 21,261 | 0      | 21,261 | 1        | Ans=0                            | 21,129 | 19     | 21,148 | 0.9991 |
|                        | Ans=1                            | 10,738 | 1      | 10,739 | 0.0001   | Ans=1                            | 10,774 | 78     | 10,852 | 0.0072 |
|                        | Total                            | 31,999 | 1      | 32,000 |          | Total                            | 31,903 | 97     | 32,000 |        |
|                        | Precision                        | 0.6644 | 1      |        |          | Precision                        | 0.6623 | 0.8041 |        |        |
|                        | F1 score                         | 0.7984 | 0.0002 |        |          | F1 score                         | 0.7966 | 0.0142 |        |        |
| Accuracy               | 0.6644                           |        |        |        | Accuracy | 0.6627                           |        |        |        |        |
| 4,000                  | Pred=0                           | Pred=1 | Total  | Recall |          | Pred=0                           | Pred=1 | Total  | Recall |        |
|                        | Ans=0                            | 20,913 | 348    | 21,261 | 0.9836   | Ans=0                            | 18,684 | 2,464  | 21,148 | 0.8835 |
|                        | Ans=1                            | 9,901  | 838    | 10,739 | 0.078    | Ans=1                            | 8,276  | 2,576  | 10,852 | 0.2374 |
|                        | Total                            | 30,814 | 1,186  | 32,000 |          | Total                            | 26,960 | 5,040  | 32,000 |        |
|                        | Precision                        | 0.6787 | 0.7066 |        |          | Precision                        | 0.693  | 0.5111 |        |        |
|                        | F1 score                         | 0.8032 | 0.1405 |        |          | F1 score                         | 0.7768 | 0.3242 |        |        |
| Accuracy               | 0.6797                           |        |        |        | Accuracy | 0.6644                           |        |        |        |        |
| 8,000                  | Pred=0                           | Pred=1 | Total  | Recall |          | Pred=0                           | Pred=1 | Total  | Recall |        |
|                        | Ans=0                            | 18,933 | 2,328  | 21,261 | 0.8905   | Ans=0                            | 18,836 | 2,312  | 21,148 | 0.8907 |
|                        | Ans=1                            | 6,646  | 4,093  | 10,739 | 0.3811   | Ans=1                            | 6,514  | 4,338  | 10,852 | 0.3997 |
|                        | Total                            | 25,579 | 6,421  | 32,000 |          | Total                            | 25,350 | 6,650  | 32,000 |        |
|                        | Precision                        | 0.7402 | 0.6374 |        |          | Precision                        | 0.743  | 0.6523 |        |        |
|                        | F1 score                         | 0.8084 | 0.477  |        |          | F1 score                         | 0.8102 | 0.4957 |        |        |
| Accuracy               | 0.7196                           |        |        |        | Accuracy | 0.7242                           |        |        |        |        |
| 16,000                 | Pred=0                           | Pred=1 | Total  | Recall |          | Pred=0                           | Pred=1 | Total  | Recall |        |
|                        | Ans=0                            | 19,298 | 1,963  | 21,261 | 0.9077   | Ans=0                            | 18,816 | 2,332  | 21,148 | 0.8897 |
|                        | Ans=1                            | 5,765  | 4,974  | 10,739 | 0.4632   | Ans=1                            | 4,113  | 6,739  | 10,852 | 0.621  |
|                        | Total                            | 25,063 | 6,937  | 32,000 |          | Total                            | 22,929 | 9,071  | 32,000 |        |
|                        | Precision                        | 0.77   | 0.717  |        |          | Precision                        | 0.8206 | 0.7429 |        |        |
|                        | F1 score                         | 0.8332 | 0.5628 |        |          | F1 score                         | 0.8538 | 0.6765 |        |        |
| Accuracy               | 0.7585                           |        |        |        | Accuracy | 0.7986                           |        |        |        |        |
| 32,000                 | Pred=0                           | Pred=1 | Total  | Recall |          | Pred=0                           | Pred=1 | Total  | Recall |        |
|                        | Ans=0                            | 18,649 | 2,612  | 21,261 | 0.8771   | Ans=0                            | 18,743 | 2,405  | 21,148 | 0.8863 |
|                        | Ans=1                            | 4,635  | 6,104  | 10,739 | 0.5684   | Ans=1                            | 3,865  | 6,987  | 10,852 | 0.6438 |
|                        | Total                            | 23,284 | 8,716  | 32,000 |          | Total                            | 22,608 | 9,392  | 32,000 |        |
|                        | Precision                        | 0.8009 | 0.7003 |        |          | Precision                        | 0.829  | 0.7439 |        |        |
|                        | F1 score                         | 0.8373 | 0.6275 |        |          | F1 score                         | 0.8567 | 0.6903 |        |        |
| Accuracy               | 0.7735                           |        |        |        | Accuracy | 0.8041                           |        |        |        |        |
| 64,000                 | Pred=0                           | Pred=1 | Total  | Recall |          | Pred=0                           | Pred=1 | Total  | Recall |        |
|                        | Ans=0                            | 19,007 | 2,254  | 21,261 | 0.894    | Ans=0                            | 18,754 | 2,394  | 21,148 | 0.8868 |
|                        | Ans=1                            | 4,019  | 6,720  | 10,739 | 0.6258   | Ans=1                            | 3,225  | 7,627  | 10,852 | 0.7028 |
|                        | Total                            | 23,026 | 8,974  | 32,000 |          | Total                            | 21,979 | 10,021 | 32,000 |        |
|                        | Precision                        | 0.8255 | 0.7488 |        |          | Precision                        | 0.8533 | 0.7611 |        |        |
|                        | F1 score                         | 0.8584 | 0.6818 |        |          | F1 score                         | 0.8697 | 0.7308 |        |        |
| Accuracy               | 0.804                            |        |        |        | Accuracy | 0.8244                           |        |        |        |        |
| 128,000                | Pred=0                           | Pred=1 | Total  | Recall |          | Pred=0                           | Pred=1 | Total  | Recall |        |
|                        | Ans=0                            | 18,409 | 2,852  | 21,261 | 0.8659   | Ans=0                            | 18,558 | 2,590  | 21,148 | 0.8775 |
|                        | Ans=1                            | 3,388  | 7,351  | 10,739 | 0.6845   | Ans=1                            | 2,730  | 8,122  | 10,852 | 0.7484 |
|                        | Total                            | 21,797 | 10,203 | 32,000 |          | Total                            | 21,288 | 10,712 | 32,000 |        |
|                        | Precision                        | 0.8446 | 0.7205 |        |          | Precision                        | 0.8718 | 0.7582 |        |        |
|                        | F1 score                         | 0.8551 | 0.702  |        |          | F1 score                         | 0.8746 | 0.7533 |        |        |
| Accuracy               | 0.805                            |        |        |        | Accuracy | 0.8337                           |        |        |        |        |



# Supplementary Table 2

Pred = "Prediction" : 0 = "unstained", 1 = "stained"  
 Ans = "Answer" : 0 = "unstained", 1 = "stained"

## Input block size (px)

|          | 32 x 32   |        |        |        |          | 64 x 64   |        |        |        |          | 128 x 128 |        |        |        |          | 256 x 256 |        |        |        |          | 512 x 512 |        |        |        |        |
|----------|-----------|--------|--------|--------|----------|-----------|--------|--------|--------|----------|-----------|--------|--------|--------|----------|-----------|--------|--------|--------|----------|-----------|--------|--------|--------|--------|
|          | Ans=0     | Pred=0 | Pred=1 | Total  | Recall   | Ans=0     | Pred=0 | Pred=1 | Total  | Recall   | Ans=0     | Pred=0 | Pred=1 | Total  | Recall   | Ans=0     | Pred=0 | Pred=1 | Total  | Recall   | Ans=0     | Pred=0 | Pred=1 | Total  | Recall |
| 0.1      | Ans=0     | 16,467 | 2,885  | 19,352 | 0.8509   | Ans=0     | 14,370 | 4,256  | 18,626 | 0.7715   | Ans=0     | 13,616 | 4,235  | 17,851 | 0.7628   | Ans=0     | 14,587 | 2,392  | 16,979 | 0.8591   | Ans=0     | 13,447 | 2,771  | 16,218 | 0.8291 |
|          | Ans=1     | 7,401  | 5,247  | 12,648 | 0.4148   | Ans=1     | 5,602  | 7,772  | 13,374 | 0.5811   | Ans=1     | 4,979  | 9,170  | 14,149 | 0.6481   | Ans=1     | 6,471  | 8,550  | 15,021 | 0.5692   | Ans=1     | 5,137  | 10,645 | 15,782 | 0.6745 |
|          | Total     | 23,868 | 8,132  | 32,000 |          | Total     | 19,972 | 12,028 | 32,000 |          | Total     | 18,595 | 13,405 | 32,000 |          | Total     | 21,058 | 10,942 | 32,000 |          | Total     | 18,584 | 13,416 | 32,000 |        |
|          | Precision | 0.6899 | 0.6452 |        |          | Precision | 0.7195 | 0.6462 |        |          | Precision | 0.7322 | 0.6841 |        |          | Precision | 0.6927 | 0.7814 |        |          | Precision | 0.7236 | 0.7935 |        |        |
|          | F1 score  | 0.762  | 0.505  |        |          | F1 score  | 0.7446 | 0.6119 |        |          | F1 score  | 0.7472 | 0.6656 |        |          | F1 score  | 0.767  | 0.6586 |        |          | F1 score  | 0.7728 | 0.7292 |        |        |
| Accuracy | 0.6786    |        |        |        | Accuracy | 0.6919    |        |        |        | Accuracy | 0.7121    |        |        |        | Accuracy | 0.723     |        |        |        | Accuracy | 0.7529    |        |        |        |        |
| 0.2      | Ans=0     | 13,946 | 5,999  | 19,945 | 0.6992   | Ans=0     | 14,719 | 4,817  | 19,536 | 0.7534   | Ans=0     | 15,570 | 3,994  | 19,564 | 0.8125   | Ans=0     | 16,199 | 2,723  | 18,922 | 0.8561   | Ans=0     | 15,390 | 3,067  | 18,457 | 0.8338 |
|          | Ans=1     | 4,805  | 7,250  | 12,055 | 0.6014   | Ans=1     | 4,721  | 7,743  | 12,464 | 0.6212   | Ans=1     | 4,840  | 7,996  | 12,836 | 0.6229   | Ans=1     | 4,685  | 8,393  | 13,078 | 0.6418   | Ans=1     | 3,403  | 10,140 | 13,543 | 0.7487 |
|          | Total     | 18,751 | 13,249 | 32,000 |          | Total     | 19,440 | 12,560 | 32,000 |          | Total     | 20,410 | 11,990 | 32,000 |          | Total     | 20,884 | 11,116 | 32,000 |          | Total     | 18,793 | 13,207 | 32,000 |        |
|          | Precision | 0.7437 | 0.5472 |        |          | Precision | 0.7572 | 0.6165 |        |          | Precision | 0.7629 | 0.6899 |        |          | Precision | 0.7757 | 0.755  |        |          | Precision | 0.8189 | 0.7678 |        |        |
|          | F1 score  | 0.7208 | 0.573  |        |          | F1 score  | 0.7553 | 0.6188 |        |          | F1 score  | 0.7869 | 0.6547 |        |          | F1 score  | 0.8139 | 0.6938 |        |          | F1 score  | 0.8263 | 0.7581 |        |        |
| Accuracy | 0.6624    |        |        |        | Accuracy | 0.7019    |        |        |        | Accuracy | 0.7364    |        |        |        | Accuracy | 0.7685    |        |        |        | Accuracy | 0.7978    |        |        |        |        |
| 0.3      | Ans=0     | 16,304 | 4,081  | 20,385 | 0.7998   | Ans=0     | 17,128 | 3,042  | 20,170 | 0.8492   | Ans=0     | 17,085 | 2,975  | 20,060 | 0.8517   | Ans=0     | 17,001 | 3,035  | 20,036 | 0.8485   | Ans=0     | 17,963 | 1,863  | 19,826 | 0.906  |
|          | Ans=1     | 5,430  | 6,185  | 11,615 | 0.5325   | Ans=1     | 5,314  | 6,516  | 11,830 | 0.5508   | Ans=1     | 4,623  | 7,317  | 11,940 | 0.6128   | Ans=1     | 3,404  | 8,560  | 11,964 | 0.7155   | Ans=1     | 3,564  | 8,610  | 12,174 | 0.7072 |
|          | Total     | 21,734 | 10,266 | 32,000 |          | Total     | 22,442 | 9,558  | 32,000 |          | Total     | 21,708 | 10,292 | 32,000 |          | Total     | 20,405 | 11,595 | 32,000 |          | Total     | 21,527 | 10,473 | 32,000 |        |
|          | Precision | 0.7502 | 0.6025 |        |          | Precision | 0.7632 | 0.6817 |        |          | Precision | 0.787  | 0.7109 |        |          | Precision | 0.8332 | 0.7382 |        |          | Precision | 0.8344 | 0.8221 |        |        |
|          | F1 score  | 0.7742 | 0.5653 |        |          | F1 score  | 0.8039 | 0.6093 |        |          | F1 score  | 0.8181 | 0.6582 |        |          | F1 score  | 0.8408 | 0.7267 |        |          | F1 score  | 0.8688 | 0.7604 |        |        |
| Accuracy | 0.7028    |        |        |        | Accuracy | 0.7389    |        |        |        | Accuracy | 0.7626    |        |        |        | Accuracy | 0.7988    |        |        |        | Accuracy | 0.8304    |        |        |        |        |
| 0.4      | Ans=0     | 17,514 | 3,227  | 20,741 | 0.8444   | Ans=0     | 17,807 | 2,872  | 20,679 | 0.8611   | Ans=0     | 17,912 | 2,776  | 20,688 | 0.8658   | Ans=0     | 18,601 | 2,219  | 20,820 | 0.8934   | Ans=0     | 18,891 | 1,920  | 20,811 | 0.9077 |
|          | Ans=1     | 6,419  | 4,840  | 11,259 | 0.4299   | Ans=1     | 4,982  | 6,339  | 11,321 | 0.5599   | Ans=1     | 3,943  | 7,369  | 11,312 | 0.6514   | Ans=1     | 3,913  | 7,267  | 11,180 | 0.65     | Ans=1     | 3,310  | 7,879  | 11,189 | 0.7042 |
|          | Total     | 23,933 | 8,067  | 32,000 |          | Total     | 22,789 | 9,211  | 32,000 |          | Total     | 21,855 | 10,145 | 32,000 |          | Total     | 22,514 | 9,486  | 32,000 |          | Total     | 22,201 | 9,799  | 32,000 |        |
|          | Precision | 0.7318 | 0.6    |        |          | Precision | 0.7814 | 0.6882 |        |          | Precision | 0.8196 | 0.7264 |        |          | Precision | 0.8262 | 0.7661 |        |          | Precision | 0.8509 | 0.8041 |        |        |
|          | F1 score  | 0.7841 | 0.5009 |        |          | F1 score  | 0.8193 | 0.6175 |        |          | F1 score  | 0.8421 | 0.6869 |        |          | F1 score  | 0.8585 | 0.7033 |        |          | F1 score  | 0.8784 | 0.7508 |        |        |
| Accuracy | 0.6986    |        |        |        | Accuracy | 0.7546    |        |        |        | Accuracy | 0.79      |        |        |        | Accuracy | 0.8084    |        |        |        | Accuracy | 0.8366    |        |        |        |        |
| 0.5      | Ans=0     | 18,617 | 2,531  | 21,148 | 0.8803   | Ans=0     | 18,507 | 2,607  | 21,114 | 0.8765   | Ans=0     | 18,985 | 2,276  | 21,261 | 0.8929   | Ans=0     | 19,629 | 1,789  | 21,418 | 0.9165   | Ans=0     | 19,767 | 1,841  | 21,608 | 0.9148 |
|          | Ans=1     | 6,609  | 4,243  | 10,852 | 0.391    | Ans=1     | 5,077  | 5,809  | 10,886 | 0.5336   | Ans=1     | 4,365  | 6,374  | 10,739 | 0.5935   | Ans=1     | 3,784  | 6,798  | 10,582 | 0.6424   | Ans=1     | 3,125  | 7,267  | 10,392 | 0.6993 |
|          | Total     | 25,226 | 6,774  | 32,000 |          | Total     | 23,584 | 8,416  | 32,000 |          | Total     | 23,350 | 8,650  | 32,000 |          | Total     | 23,413 | 8,587  | 32,000 |          | Total     | 22,892 | 9,108  | 32,000 |        |
|          | Precision | 0.738  | 0.6264 |        |          | Precision | 0.7847 | 0.6902 |        |          | Precision | 0.8131 | 0.7369 |        |          | Precision | 0.8384 | 0.7917 |        |          | Precision | 0.8635 | 0.7979 |        |        |
|          | F1 score  | 0.8029 | 0.4814 |        |          | F1 score  | 0.8281 | 0.6019 |        |          | F1 score  | 0.8511 | 0.6575 |        |          | F1 score  | 0.8757 | 0.7093 |        |          | F1 score  | 0.8894 | 0.7453 |        |        |
| Accuracy | 0.7144    |        |        |        | Accuracy | 0.7599    |        |        |        | Accuracy | 0.7925    |        |        |        | Accuracy | 0.8258    |        |        |        | Accuracy | 0.8448    |        |        |        |        |
| 0.6      | Ans=0     | 19,768 | 1,766  | 21,534 | 0.918    | Ans=0     | 18,949 | 2,655  | 21,604 | 0.8771   | Ans=0     | 19,315 | 2,492  | 21,807 | 0.8857   | Ans=0     | 20,302 | 1,724  | 22,026 | 0.9217   | Ans=0     | 20,958 | 1,359  | 22,317 | 0.9391 |
|          | Ans=1     | 7,375  | 3,091  | 10,466 | 0.2953   | Ans=1     | 5,315  | 5,081  | 10,396 | 0.4887   | Ans=1     | 4,724  | 5,469  | 10,193 | 0.5365   | Ans=1     | 3,703  | 6,271  | 9,974  | 0.6287   | Ans=1     | 3,621  | 6,062  | 9,683  | 0.626  |
|          | Total     | 27,143 | 4,857  | 32,000 |          | Total     | 24,264 | 7,736  | 32,000 |          | Total     | 24,039 | 7,961  | 32,000 |          | Total     | 24,005 | 7,995  | 32,000 |          | Total     | 24,579 | 7,421  | 32,000 |        |
|          | Precision | 0.7283 | 0.6364 |        |          | Precision | 0.781  | 0.6568 |        |          | Precision | 0.8035 | 0.687  |        |          | Precision | 0.8457 | 0.7844 |        |          | Precision | 0.8527 | 0.8169 |        |        |
|          | F1 score  | 0.8122 | 0.4034 |        |          | F1 score  | 0.8262 | 0.5604 |        |          | F1 score  | 0.8426 | 0.6025 |        |          | F1 score  | 0.8821 | 0.698  |        |          | F1 score  | 0.8938 | 0.7088 |        |        |
| Accuracy | 0.7143    |        |        |        | Accuracy | 0.7509    |        |        |        | Accuracy | 0.7745    |        |        |        | Accuracy | 0.8304    |        |        |        | Accuracy | 0.8444    |        |        |        |        |
| 0.7      | Ans=0     | 20,678 | 1,346  | 22,024 | 0.9389   | Ans=0     | 19,789 | 2,391  | 22,180 | 0.8922   | Ans=0     | 20,711 | 1,693  | 22,404 | 0.9244   | Ans=0     | 20,217 | 2,448  | 22,665 | 0.892    | Ans=0     | 21,223 | 1,864  | 23,087 | 0.9193 |
|          | Ans=1     | 7,311  | 2,665  | 9,976  | 0.2671   | Ans=1     | 5,177  | 4,843  | 9,820  | 0.4728   | Ans=1     | 4,619  | 4,977  | 9,596  | 0.5187   | Ans=1     | 3,503  | 5,832  | 9,335  | 0.6247   | Ans=1     | 3,156  | 5,757  | 8,913  | 0.6459 |
|          | Total     | 27,989 | 4,011  | 32,000 |          | Total     | 24,966 | 7,034  | 32,000 |          | Total     | 25,330 | 6,670  | 32,000 |          | Total     | 23,720 | 8,286  | 32,000 |          | Total     | 24,379 | 7,621  | 32,000 |        |
|          | Precision | 0.7388 | 0.6644 |        |          | Precision | 0.7926 | 0.6601 |        |          | Precision | 0.8176 | 0.7462 |        |          | Precision | 0.8523 | 0.7043 |        |          | Precision | 0.8705 | 0.7554 |        |        |
|          | F1 score  | 0.8269 | 0.3811 |        |          | F1 score  | 0.8395 | 0.551  |        |          | F1 score  | 0.8678 | 0.612  |        |          | F1 score  | 0.8717 | 0.6622 |        |          | F1 score  | 0.8942 | 0.6964 |        |        |
| Accuracy | 0.7295    |        |        |        | Accuracy | 0.7635    |        |        |        | Accuracy | 0.8027    |        |        |        | Accuracy | 0.814     |        |        |        | Accuracy | 0.8431    |        |        |        |        |
| 0.8      | Ans=0     | 21,310 | 1,364  | 22,674 | 0.9398   | Ans=0     | 21,072 | 1,890  | 22,962 | 0.9177   | Ans=0     | 21,369 | 1,938  | 23,307 | 0.9168   | Ans=0     | 22,630 | 1,524  | 24,154 | 0.9369   | Ans=0     | 22,630 | 1,524  | 24,154 | 0.9369 |
|          | Ans=1     | 7,072  | 2,254  | 9,326  | 0.2417   | Ans=1     | 5,666  | 3,372  | 9,038  | 0.3731   | Ans=1     | 4,480  | 4,213  | 8,693  | 0.4846   | Ans=1     | 3,442  | 4,404  | 7,846  | 0.5613   | Ans=1     | 3,442  | 4,404  | 7,846  | 0.5613 |
|          | Total     | 28,382 | 3,618  | 32,000 |          | Total     | 26,738 | 5,262  | 32,000 |          | Total     | 25,849 | 6,151  | 32,000 |          | Total     | 26,072 | 5,928  | 32,000 |          | Total     | 26,072 | 5,928  | 32,000 |        |
|          | Precision | 0.7508 | 0.623  |        |          | Precision | 0.7881 | 0.6408 |        |          | Precision | 0.8267 | 0.6849 |        |          | Precision | 0.868  | 0.7429 |        |          | Precision | 0.868  | 0.7429 |        |        |
|          | F1 score  | 0.8348 | 0.3483 |        |          | F1 score  | 0.848  | 0.4716 |        |          | F1 score  | 0.8694 | 0.5676 |        |          | F1 score  | 0.9011 | 0.6395 |        |          | F1 score  | 0.9011 | 0.6395 |        |        |
| Accuracy | 0.7364    |        |        |        | Accuracy | 0.7639    |        |        |        | Accuracy | 0.7994    |        |        |        | Accuracy | 0.8448    |        |        |        | Accuracy | 0.8448    |        |        |        |        |
| 0.9      | Ans=0     | 22,047 | 1,491  | 23,538 | 0.9367   | Ans=0     | 22,950 | 1,345  | 24,295 | 0.9446   | Ans=0     | 23,183 | 1,728  | 24,911 | 0.9306   | Ans=0     | 24,022 | 1,513  | 25,535 | 0.9407   | Ans=0     | 24,469 | 1,798  | 26,267 | 0.9315 |
|          | Ans=1     | 6,538  | 1,924  | 8,462  | 0.2274   | Ans=1     | 5,848  | 1,857  | 7,705  | 0.241    | Ans=1     | 4,820  | 2,269  | 7,089  | 0.3201   | Ans=1     | 4,415  | 2,050  | 6,465  | 0.3171   | Ans=1     | 3,449  | 2,284  | 5,733  | 0.3984 |
|          | Total     | 28,585 | 3,415  | 32,000 |          | Total     | 28,798 | 3,202  | 32,000 |          | Total     | 28,003 | 3,997  | 32,000 |          | Total     | 28,437 | 3,563  | 32,000 |          | Total     | 27,918 | 4,082  | 32,000 |        |
|          | Precision | 0.7713 | 0.5634 |        |          | Precision | 0.7969 | 0.58   |        |          | Precision | 0.8279 | 0.5677 |        |          | Precision | 0.8447 | 0.5754 |        |          | Precision | 0.8765 | 0.5595 |        |        |
|          | F1 score  | 0.846  | 0.324  |        |          | F1 score  | 0.8645 | 0.3405 |        |          | F1 score  | 0.8763 | 0.4093 |        |          | F1 score  | 0.8902 | 0.4089 |        |          | F1 score  | 0.9032 | 0.4654 |        |        |
| Accuracy | 0.7491    |        |        |        | Accuracy | 0.7752    |        |        |        | Accuracy | 0.7954    |        |        |        | Accuracy | 0.8147    |        |        |        | Accuracy | 0.836     |        |        |        |        |

Ratio of white to black pixels

### Supplementary Table 3

Pred = "Prediction" : 0 = "unstained" , 1 = "stained"  
 Ans = "Answer" : 0 = "unstained" , 1 = "stained"

Target block size: 32 x 32 (px)

Target block size: 128 x 128 (px)

Input block size (px)

|         |           |        |        |        |        |
|---------|-----------|--------|--------|--------|--------|
| 32 x 32 |           | Pred=0 | Pred=1 | Total  | Recall |
|         | Ans=0     | 17,680 | 2,705  | 20,385 | 0.8673 |
|         | Ans=1     | 6,259  | 5,356  | 11,615 | 0.4611 |
|         | Total     | 23,939 | 8,061  | 32,000 |        |
|         | Precision | 0.7385 | 0.6644 |        |        |
|         | F1 score  | 0.7978 | 0.5444 |        |        |
|         | Accuracy  | 0.7199 |        |        |        |

|         |           |        |        |        |        |
|---------|-----------|--------|--------|--------|--------|
| 64 x 64 |           | Pred=0 | Pred=1 | Total  | Recall |
|         | Ans=0     | 17,991 | 2,394  | 20,385 | 0.8826 |
|         | Ans=1     | 5,533  | 6,082  | 11,615 | 0.5236 |
|         | Total     | 23,524 | 8,476  | 32,000 |        |
|         | Precision | 0.7648 | 0.7176 |        |        |
|         | F1 score  | 0.8195 | 0.6054 |        |        |
|         | Accuracy  | 0.7523 |        |        |        |

|           |           |        |        |        |        |
|-----------|-----------|--------|--------|--------|--------|
| 128 x 128 |           | Pred=0 | Pred=1 | Total  | Recall |
|           | Ans=0     | 17,781 | 2,604  | 20,385 | 0.8723 |
|           | Ans=1     | 4,420  | 7,195  | 11,615 | 0.6195 |
|           | Total     | 22,201 | 9,799  | 32,000 |        |
|           | Precision | 0.8009 | 0.7343 |        |        |
|           | F1 score  | 0.8351 | 0.672  |        |        |
|           | Accuracy  | 0.7805 |        |        |        |

|           |        |        |        |        |
|-----------|--------|--------|--------|--------|
|           | Pred=0 | Pred=1 | Total  | Recall |
| Ans=0     | 18,409 | 2,852  | 21,261 | 0.8659 |
| Ans=1     | 3,388  | 7,351  | 10,739 | 0.6845 |
| Total     | 21,797 | 10,203 | 32,000 |        |
| Precision | 0.8446 | 0.7205 |        |        |
| F1 score  | 0.8551 | 0.702  |        |        |
| Accuracy  | 0.805  |        |        |        |

|           |           |        |        |        |        |
|-----------|-----------|--------|--------|--------|--------|
| 256 x 256 |           | Pred=0 | Pred=1 | Total  | Recall |
|           | Ans=0     | 17,888 | 2,497  | 20,385 | 0.8775 |
|           | Ans=1     | 3,656  | 7,959  | 11,615 | 0.6852 |
|           | Total     | 21,544 | 10,456 | 32,000 |        |
|           | Precision | 0.8303 | 0.7612 |        |        |
|           | F1 score  | 0.8533 | 0.7212 |        |        |
|           | Accuracy  | 0.8077 |        |        |        |

|           |        |        |        |        |
|-----------|--------|--------|--------|--------|
|           | Pred=0 | Pred=1 | Total  | Recall |
| Ans=0     | 18,187 | 1,873  | 20,060 | 0.9066 |
| Ans=1     | 3,946  | 7,994  | 11,940 | 0.6695 |
| Total     | 22,133 | 9,867  | 32,000 |        |
| Precision | 0.8217 | 0.8102 |        |        |
| F1 score  | 0.8621 | 0.7332 |        |        |
| Accuracy  | 0.8182 |        |        |        |

|           |           |        |        |        |        |
|-----------|-----------|--------|--------|--------|--------|
| 512 x 512 |           | Pred=0 | Pred=1 | Total  | Recall |
|           | Ans=0     | 18,397 | 1,988  | 20,385 | 0.9025 |
|           | Ans=1     | 3,173  | 8,442  | 11,615 | 0.7268 |
|           | Total     | 21,570 | 10,430 | 32,000 |        |
|           | Precision | 0.8529 | 0.8094 |        |        |
|           | F1 score  | 0.877  | 0.7659 |        |        |
|           | Accuracy  | 0.8387 |        |        |        |

|           |        |        |        |        |
|-----------|--------|--------|--------|--------|
|           | Pred=0 | Pred=1 | Total  | Recall |
| Ans=0     | 18,356 | 1,704  | 20,060 | 0.9151 |
| Ans=1     | 3,645  | 8,295  | 11,940 | 0.6947 |
| Total     | 22,001 | 9,999  | 32,000 |        |
| Precision | 0.8343 | 0.8296 |        |        |
| F1 score  | 0.8728 | 0.7562 |        |        |
| Accuracy  | 0.8328 |        |        |        |

## Supplementary Table 4

Pred = "Prediction" : 0 = "unstained" , 1 = "stained"  
 Ans = "Answer" : 0 = "unstained" , 1 = "stained"

A

Small network

Large network

Automatically binarized

|           | Pred=0 | Pred=1 | Total  | Recall |
|-----------|--------|--------|--------|--------|
| Ans=0     | 18,043 | 1,783  | 19,826 | 0.9101 |
| Ans=1     | 2,724  | 9,450  | 12,174 | 0.7762 |
| Total     | 20,767 | 11,233 | 32,000 |        |
| Precision | 0.8688 | 0.8413 |        |        |
| F1 score  | 0.889  | 0.8075 |        |        |
| Accuracy  | 0.8592 |        |        |        |

|           | Pred=0 | Pred=1 | Total  | Recall |
|-----------|--------|--------|--------|--------|
| Ans=0     | 18,291 | 1,535  | 19,826 | 0.9226 |
| Ans=1     | 1,574  | 10,600 | 12,174 | 0.8707 |
| total     | 19,865 | 12,135 | 32,000 |        |
| Precision | 0.9208 | 0.8735 |        |        |
| F1 score  | 0.9217 | 0.8721 |        |        |
| Accuracy  | 0.9028 |        |        |        |

Rebinarized

|           | Pred=0 | Pred=1 | Total  | Recall |
|-----------|--------|--------|--------|--------|
| Ans=0     | 23,556 | 974    | 24,530 | 0.9603 |
| Ans=1     | 1,354  | 6,116  | 7,470  | 0.8187 |
| Total     | 24,910 | 7,090  | 32,000 |        |
| Precision | 0.9456 | 0.8626 |        |        |
| F1 score  | 0.9529 | 0.8401 |        |        |
| Accuracy  | 0.9273 |        |        |        |

|           | Pred=0 | Pred=1 | Total  | Recall |
|-----------|--------|--------|--------|--------|
| Ans=0     | 23,927 | 603    | 24,530 | 0.9754 |
| Ans=1     | 622    | 6,848  | 7,470  | 0.9167 |
| Total     | 24,549 | 7,451  | 32,000 |        |
| Precision | 0.9747 | 0.9191 |        |        |
| F1 score  | 0.975  | 0.9179 |        |        |
| Accuracy  | 0.9617 |        |        |        |

B

Small network  
Automatically binarized

Large network  
Rebinarized

Fold 1

|           | Pred=0 | Pred=1 | Total  | Recall |
|-----------|--------|--------|--------|--------|
| Ans=0     | 17,764 | 12,928 | 30,692 | 0.5788 |
| Ans=1     | 488    | 8,820  | 9,308  | 0.9476 |
| Total     | 18,252 | 21,748 | 40,000 |        |
| Precision | 0.9733 | 0.4056 |        |        |
| F1 score  | 0.7259 | 0.568  |        |        |
| Accuracy  | 0.6646 |        |        |        |

|           | Pred=0 | Pred=1 | Total  | Recall |
|-----------|--------|--------|--------|--------|
| Ans=0     | 34,853 | 2,740  | 37,593 | 0.9271 |
| Ans=1     | 972    | 1,435  | 2,407  | 0.5962 |
| Total     | 35,825 | 4,175  | 40,000 |        |
| Precision | 0.9729 | 0.3437 |        |        |
| F1 score  | 0.9494 | 0.436  |        |        |
| Accuracy  | 0.9072 |        |        |        |

Fold 2

|           | Pred=0 | Pred=1 | Total  | Recall |
|-----------|--------|--------|--------|--------|
| Ans=0     | 14,204 | 3,980  | 18,184 | 0.7811 |
| Ans=1     | 3,679  | 18,137 | 21,816 | 0.8314 |
| Total     | 17,883 | 22,117 | 40,000 |        |
| Precision | 0.7943 | 0.82   |        |        |
| F1 score  | 0.7876 | 0.8257 |        |        |
| Accuracy  | 0.8085 |        |        |        |

|           | Pred=0 | Pred=1 | Total  | Recall |
|-----------|--------|--------|--------|--------|
| Ans=0     | 18,096 | 1,505  | 19,601 | 0.9232 |
| Ans=1     | 3,984  | 16,415 | 20,399 | 0.8047 |
| Total     | 22,080 | 17,920 | 40,000 |        |
| Precision | 0.8196 | 0.916  |        |        |
| F1 score  | 0.8683 | 0.8568 |        |        |
| Accuracy  | 0.8628 |        |        |        |

Fold 3

|           | Pred=0 | Pred=1 | Total  | Recall |
|-----------|--------|--------|--------|--------|
| Ans=0     | 20,037 | 1,934  | 21,971 | 0.912  |
| Ans=1     | 6,803  | 11,226 | 18,029 | 0.6227 |
| Total     | 26,840 | 13,160 | 40,000 |        |
| Precision | 0.7465 | 0.853  |        |        |
| F1 score  | 0.821  | 0.7199 |        |        |
| Accuracy  | 0.7816 |        |        |        |

|           | Pred=0 | Pred=1 | Total  | Recall |
|-----------|--------|--------|--------|--------|
| Ans=0     | 28,847 | 749    | 29,596 | 0.9747 |
| Ans=1     | 2,245  | 8,159  | 10,404 | 0.7842 |
| Total     | 31,092 | 8,908  | 40,000 |        |
| Precision | 0.9278 | 0.9159 |        |        |
| F1 score  | 0.9507 | 0.845  |        |        |
| Accuracy  | 0.9252 |        |        |        |

Fold 4

|           | Pred=0 | Pred=1 | Total  | Recall |
|-----------|--------|--------|--------|--------|
| Ans=0     | 23,713 | 5,601  | 29,314 | 0.8089 |
| Ans=1     | 3,116  | 7,570  | 10,686 | 0.7084 |
| Total     | 26,829 | 13,171 | 40,000 |        |
| Precision | 0.8839 | 0.5747 |        |        |
| F1 score  | 0.8447 | 0.6346 |        |        |
| Accuracy  | 0.7821 |        |        |        |

|           | Pred=0 | Pred=1 | Total  | Recall |
|-----------|--------|--------|--------|--------|
| Ans=0     | 34,920 | 952    | 35,872 | 0.9735 |
| Ans=1     | 734    | 3,394  | 4,128  | 0.8222 |
| Total     | 35,654 | 4,346  | 40,000 |        |
| Precision | 0.9794 | 0.7809 |        |        |
| F1 score  | 0.9764 | 0.801  |        |        |
| Accuracy  | 0.9578 |        |        |        |
